# Supplementary material
Source: publisher figshare collection journal article supplement (https://sage.figshare.com/ndownloader/files/23117135)
Supplement: Supplementary file 1 [file 23117135]

Appendix B: KHB Analysis of Independent Attenuation Effects of the Association between Low Self-Control and Legal Cynicism

|                                                       | <i>Police Stop Exposure</i>  |                            |
|-------------------------------------------------------|------------------------------|----------------------------|
|                                                       | <u><i>Vicarious Only</i></u> | <u><i>Direct</i></u>       |
|                                                       | % Reduced<br>(z-statistic)   | % Reduced<br>(z-statistic) |
|                                                       | <b>Legal Cynicism</b>        | <b>Legal Cynicism</b>      |
| <b><u><i>Vicarious Police Stops Measures:</i></u></b> |                              |                            |
| Witnessed Stops Index                                 | 2.51%<br>(2.04*)             | 0.90%<br>(1.00)            |
| Known Persons Stopped Index                           | 1.12%<br>(1.43)              | 0.01%<br>(0.03)            |
| Procedural Justice Perceptions                        | 4.07%<br>(2.87**)            | -                          |
| <b><u><i>Direct Police Stops Measures:</i></u></b>    |                              |                            |
| Number of Police Stops                                | -                            | 2.77%<br>(1.90)            |
| Young Age at First Stop                               | -                            | 0.01%<br>(0.09)            |
| Officer Intrusiveness Index                           | -                            | 1.45%<br>(1.20)            |
| Procedural Justice Perceptions                        | -                            | 4.14%<br>(2.29*)           |
| Post-Traumatic Stress Following Stop                  | -                            | -3.04%<br>(-1.19)          |
| Social Stigma Following Stop                          | -                            | 5.46%<br>(2.50**)          |
| Arrested/Taken into Custody                           | -                            | 3.17%<br>(1.85)            |
| <b><u><i>Total Attenuation:</i></u></b>               | <b>7.70%</b>                 | <b>14.87%</b>              |
| N                                                     | 1,782                        | 918                        |

Note: \*  $p < 0.05$ ; \*\*  $p < 0.01$ . All models also include all of the covariates listed in Table 2, which are suppressed to conserved space. In line with prior research (Jacobsen, 2019), results based on the first of the 20 imputed datasets.
